# Supplementary material for: Multi-frequency electrical impedance tomography as a non-invasive tool to characterize and monitor crop root systems
Source: Copernicus journal article supplement (doi:10.5194/bg-14-921-2017), 2017-02-28
Supplement: Supplementary file 1 [file bg-14-921-2017-supplement.pdf]

Supplement of Biogeosciences, 14, 921–939, 2017  
<http://www.biogeosciences.net/14/921/2017/>  
doi:10.5194/bg-14-921-2017-supplement  
© Author(s) 2017. CC Attribution 3.0 License.

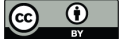

*Supplement of*

## **Multi-frequency electrical impedance tomography as a non-invasive tool to characterize and monitor crop root systems**

**Maximilian Weigand and Andreas Kemna**

*Correspondence to:* Maximilian Weigand (mweigand@geo.uni-bonn.de)

The copyright of individual parts of the supplement might differ from the CC-BY 3.0 licence.

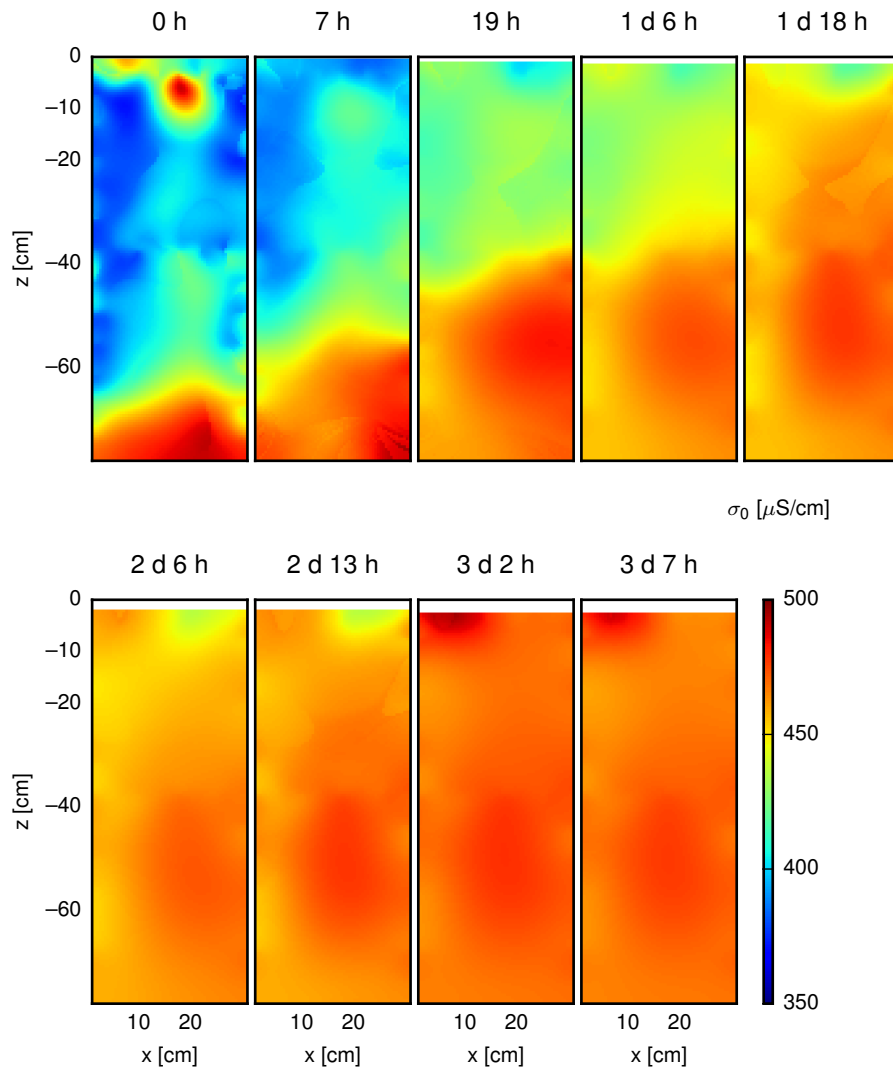

Supplement 1: Spatial distribution of the DD-derived parameter  $\sigma_0$  for selected time steps. The top boundary is adjusted according to the estimated water table for each measurement time.
